# Supplementary material for: Factors Associated With Changes in Pregnancy Intention Among Women Who Were Mothers of Young Children in New York City Following the COVID-19 Outbreak
Source: PubMed Central journal article supplement (PMC8444024; doi:10.1001/jamanetworkopen.2021.24273), 2021-09-15
Supplement: jamanetwopen-e2124273-s001.pdf [file jamanetwopen-e2124273-s001.pdf]

## Supplementary Online Content

Kahn LG, Trasande L, Liu M, Mehta-Lee SS, Brubaker SG, Jacobson MH. Factors associated with changes in pregnancy intention among women who were mothers of young children in New York City following the COVID-19 outbreak. *JAMA Netw Open.* 2021;4(9):e2124273.  
doi:10.1001/jamanetworkopen.2021.24273

**eTable 1.** Demographic Profiles of New York University Children's Health and Environment Study (CHES) Participants vs. CHES COVID-19 Survey Respondents

**eTable 2.** Characteristics of Study Population by Pre-COVID-19 Fertility Intentions

**eTable 3.** Crude and Adjusted Odds Ratios (OR) and 95% Confidence Intervals (CI) From Logistic Regression Models for Predictors of Changing Fertility Intention From Thinking About Trying to Get Pregnant Before COVID-19 to No Longer Thinking About Trying to Get Pregnant After COVID-19 (n=191)

**eTable 4.** Crude and Adjusted Odds Ratios (OR) and 95% Confidence Intervals (CI) From Logistic Regression Models for Predictors of Changing Fertility Intention From Trying to Get Pregnant Before COVID-19 to No Longer Trying to Get Pregnant After COVID-19 (n=61)

**eTable 5.** Adjusted Odds Ratios (OR) and 95% Confidence Intervals (CI) From Logistic Regression Models for Predictors of Changing Fertility Intention From Trying or Thinking About Trying to Get Pregnant Before COVID-19 to No Longer Trying or Thinking About Trying to Get Pregnant After COVID-19 Excluding Those Living Outside the New York City Metro Area (n=214)

**eTable 6.** Adjusted Odds Ratios (OR) and 95% Confidence Intervals (CI) From Logistic Regression Models for Predictors of Thinking of Becoming Pregnant Among Those Who Were Not Thinking About It Before COVID-19 Excluding Those Living Outside the New York City Metro Area (n=817)

This supplementary material has been provided by the authors to give readers additional information about their work.

**eTable 1.** Demographic profiles of New York University Children's Health and Environment Study (CHES) participants vs. CHES COVID-19 survey respondents

|                                | Total CHES COVID-19<br>survey respondents<br>(n=1560) | Total CHES cohort<br>(n=2193) |
|--------------------------------|-------------------------------------------------------|-------------------------------|
| Age, mean (SD)                 | 32.1 (5.6)                                            | 31.8 (5.6)                    |
| Race/ethnicity, n (%)          |                                                       |                               |
| Hispanic                       | 781 (50.2)                                            | 1071 (49.0)                   |
| White                          | 518 (33.3)                                            | 727 (33.3)                    |
| Black                          | 70 (4.5)                                              | 130 (6.0)                     |
| Asian                          | 141 (9.1)                                             | 193 (8.8)                     |
| Other/Multiple                 | 46 (3.0)                                              | 64 (2.9)                      |
| Insurance status, n (%)        |                                                       |                               |
| Public                         | 770 (50.3)                                            | 1139 (52.5)                   |
| Private                        | 761 (49.7)                                            | 1032 (47.5)                   |
| Annual household income, n (%) |                                                       |                               |
| <\$30,000                      | 272 (17.4)                                            | 362 (16.5)                    |
| \$30,000 to \$100,000          | 270 (17.3)                                            | 425 (19.4)                    |
| ≥\$100,000                     | 601 (38.5)                                            | 805 (36.7)                    |
| Don't know                     | 417 (26.7)                                            | 601 (27.4)                    |
| Education, n (%)               |                                                       |                               |
| High school or less            | 504 (33.1)                                            | 704 (32.5)                    |
| Some college                   | 223 (14.6)                                            | 362 (16.7)                    |
| Bachelor's degree              | 365 (24.0)                                            | 498 (23.0)                    |
| Postgraduate                   | 432 (28.4)                                            | 602 (27.8)                    |

| <b>eTable 2.</b> Characteristics of study population by pre-COVID-19 fertility intentions |                     |      |                                          |      |                                           |      |                                              |  |   |
|-------------------------------------------------------------------------------------------|---------------------|------|------------------------------------------|------|-------------------------------------------|------|----------------------------------------------|--|---|
|                                                                                           | <i>Before COVID</i> |      | Thinking about becoming pregnant (n=191) |      | Actively trying to become pregnant (n=61) |      | Not thinking about becoming pregnant (n=927) |  | p |
|                                                                                           |                     |      |                                          |      |                                           |      |                                              |  |   |
| Age, years mean (SD)                                                                      | 32.4                | 4.5  | 32.0                                     | 5.6  | 32.2                                      | 5.8  | 0.89                                         |  |   |
| Race/ethnicity, n (%)                                                                     |                     |      |                                          |      |                                           |      | <0.01                                        |  |   |
| Hispanic                                                                                  | 49                  | 25.7 | 29                                       | 47.5 | 544                                       | 58.7 |                                              |  |   |
| Non-Hispanic White                                                                        | 108                 | 56.5 | 20                                       | 32.8 | 244                                       | 26.3 |                                              |  |   |
| Non-Hispanic Black                                                                        | 10                  | 5.2  | 3                                        | 4.9  | 43                                        | 4.6  |                                              |  |   |
| Non-Hispanic Asian                                                                        | 20                  | 10.5 | 7                                        | 11.5 | 67                                        | 7.2  |                                              |  |   |
| Non-Hispanic Other/Multiple                                                               | 3                   | 1.6  | 2                                        | 3.3  | 28                                        | 3.0  |                                              |  |   |
| Insurance status, n (%)                                                                   |                     |      |                                          |      |                                           |      | <0.01                                        |  |   |
| Public                                                                                    | 43                  | 22.5 | 28                                       | 45.9 | 552                                       | 59.6 |                                              |  |   |
| Private                                                                                   | 147                 | 77.0 | 32                                       | 52.5 | 368                                       | 39.7 |                                              |  |   |
| Annual household income, n (%)                                                            |                     |      |                                          |      |                                           |      | <0.01                                        |  |   |
| <\$30,000                                                                                 | 16                  | 8.4  | 8                                        | 13.1 | 183                                       | 19.7 |                                              |  |   |
| \$30,000 to \$100,000                                                                     | 30                  | 15.7 | 15                                       | 24.6 | 163                                       | 17.6 |                                              |  |   |
| ≥\$100,000                                                                                | 127                 | 66.5 | 24                                       | 39.3 | 276                                       | 29.8 |                                              |  |   |
| Don't know                                                                                | 18                  | 9.4  | 14                                       | 23.0 | 305                                       | 32.9 |                                              |  |   |
| Education, n (%)                                                                          |                     |      |                                          |      |                                           |      | <0.01                                        |  |   |
| High school or less                                                                       | 16                  | 8.4  | 18                                       | 29.5 | 359                                       | 38.7 |                                              |  |   |
| Some college                                                                              | 21                  | 11.0 | 8                                        | 13.1 | 148                                       | 16.0 |                                              |  |   |
| Bachelor's degree                                                                         | 64                  | 33.5 | 21                                       | 34.4 | 181                                       | 19.5 |                                              |  |   |
| Postgraduate                                                                              | 87                  | 45.6 | 14                                       | 23.0 | 217                                       | 23.4 |                                              |  |   |
| Children (≤18 years) living in house, mean (SD)                                           | 1.3                 | 0.8  | 1.6                                      | 0.8  | 2.0                                       | 1.1  | <0.01                                        |  |   |
| Pre-COVID financial security, n (%)                                                       |                     |      |                                          |      |                                           |      | <0.01                                        |  |   |
| Comfortable with extra                                                                    | 116                 | 60.7 | 24                                       | 39.3 | 296                                       | 31.9 |                                              |  |   |
| Enough but no extra                                                                       | 58                  | 30.4 | 27                                       | 44.3 | 437                                       | 47.1 |                                              |  |   |
| Have to cut back                                                                          | 10                  | 5.2  | 5                                        | 8.2  | 123                                       | 13.3 |                                              |  |   |
| Cannot make ends meet                                                                     | 7                   | 3.7  | 4                                        | 6.6  | 64                                        | 6.9  |                                              |  |   |
| Took questionnaire before June 1, 2020                                                    | 145                 | 75.9 | 47                                       | 77.1 | 734                                       | 79.2 | 0.58                                         |  |   |

**eTable 3.** Crude and adjusted odds ratios (OR) and 95% Confidence Intervals (CI) from logistic regression models for predictors of changing fertility intention from thinking about trying to get pregnant before COVID-19 to no longer thinking about trying to get pregnant after COVID-19 (n=191).

|                                            | No longer thinking vs. still thinking |          |                             |          |
|--------------------------------------------|---------------------------------------|----------|-----------------------------|----------|
|                                            | <b>Crude OR (95% CI)</b>              | <b>p</b> | <b>Adjusted OR (95% CI)</b> | <b>p</b> |
| Maternal age                               | 0.91 (0.85, 0.97)                     | 0.01     | 0.93 (0.85, 1.01)           | 0.09     |
| Hispanic (vs. not Hispanic)                | 1.92 (0.99, 3.72)                     | 0.05     | 0.72 (0.30, 1.74)           | 0.47     |
| < College degree (vs. ≥ college)           | 4.75 (2.20, 10.27)                    | <0.01    | 2.20 (0.77, 6.28)           | 0.14     |
| Number of children in the home             | 1.52 (1.00, 2.30)                     | 0.05     | 1.16 (0.75, 1.80)           | 0.51     |
| COVID diagnosis (self) (vs. not)           | 1.48 (0.72, 3.05)                     | 0.28     | 1.30 (0.57, 2.96)           | 0.53     |
| PSS-4 score                                | 1.16 (1.05, 1.29)                     | 0.01     | 1.13 (1.00, 1.27)           | 0.05     |
| Current financial security (less vs. more) | 1.88 (1.39, 2.55)                     | <0.01    | 1.47 (0.98, 2.21)           | 0.06     |
| Took questionnaire before June 1, 2020     | 2.05 (1.06, 4.77)                     | 0.04     | 2.14 (0.92, 4.94)           | 0.08     |

**eTable 4.** Crude and adjusted odds ratios (OR) and 95% Confidence Intervals (CI) from logistic regression models for predictors of changing fertility intention from trying to get pregnant before COVID-19 to no longer trying to get pregnant after COVID-19 (n=61)

|                                            | No longer trying vs. still trying |      |                      |      |
|--------------------------------------------|-----------------------------------|------|----------------------|------|
|                                            | Crude OR (95% CI)                 | p    | Adjusted OR (95% CI) | p    |
| Maternal age                               | 0.94 (0.85, 1.03)                 | 0.17 | 0.98 (0.87, 1.10)    | 0.71 |
| Hispanic (vs. not Hispanic)                | 3.63 (1.26, 10.44)                | 0.02 | 2.68 (0.60, 12.0)    | 0.20 |
| < College degree (vs. ≥ college)           | 3.20 (1.11, 9.22)                 | 0.03 | 1.34 (0.27, 6.71)    | 0.72 |
| Number of children in the home             | 2.00 (1.00, 4.01)                 | 0.05 | 1.70 (0.74, 3.89)    | 0.21 |
| COVID diagnosis (self) (vs. not)           | 1.69 (0.43, 6.70)                 | 0.46 | 1.90 (0.39, 9.16)    | 0.42 |
| PSS-4 score                                | 1.08 (0.90, 1.29)                 | 0.41 | 1.05 (0.85, 1.29)    | 0.68 |
| Current financial security (less vs. more) | 1.49 (0.89, 2.52)                 | 0.13 | 0.91 (0.44, 1.89)    | 0.79 |
| Took questionnaire before June 1, 2020     | 0.96 (0.29, 3.16)                 | 0.94 | 1.99 (0.44, 9.04)    | 0.37 |

**eTable 5.** Adjusted odds ratios (OR) and 95% Confidence Intervals (CI) from logistic regression models for predictors of changing fertility intention from trying or thinking about trying to get pregnant before COVID-19 to no longer trying or thinking about trying to get pregnant after COVID-19 excluding those living outside the New York City metro area (n=214)

|                                        | No longer trying or thinking vs. still trying or thinking |          |
|----------------------------------------|-----------------------------------------------------------|----------|
|                                        | <b>Adjusted OR (95% CI)</b>                               | <b>p</b> |
| Maternal age                           | 0.96 (0.89, 1.03)                                         | 0.22     |
| Hispanic (vs. not Hispanic)            | 0.99 (0.46, 2.16)                                         | 0.99     |
| < College degree (vs. ≥ college)       | 2.33 (0.93, 5.84)                                         | 0.07     |
| Number of children in the home         | 1.78 (1.11, 2.85)                                         | 0.02     |
| COVID diagnosis (self) (vs. not)       | 1.26 (0.59, 2.69)                                         | 0.55     |
| PSS-4 score                            | 1.05 (0.94, 1.17)                                         | 0.39     |
| Current financial insecurity           | 1.23 (0.85, 1.78)                                         | 0.28     |
| Took questionnaire before June 1, 2020 | 1.72 (0.79, 3.76)                                         | 0.18     |

**eTable 6.** Adjusted odds ratios (OR) and 95% Confidence Intervals (CI) from logistic regression models for predictors of thinking of becoming pregnant among those who were NOT thinking about it before COVID-19 excluding those living outside the New York City metro area (n=817).

|                                        | Thinking of becoming pregnant vs. still not |          |
|----------------------------------------|---------------------------------------------|----------|
|                                        | <b>Adjusted OR (95% CI)</b>                 | <b>p</b> |
| Maternal age                           | 0.95 (0.89, 1.02)                           | 0.15     |
| Hispanic (vs. not Hispanic)            | 0.32 (0.12, 0.86)                           | 0.02     |
| < College degree (vs. ≥ college)       | 1.51 (0.53, 4.30)                           | 0.44     |
| Number of children in the home         | 0.67 (0.42, 1.06)                           | 0.09     |
| COVID diagnosis (self) (vs. not)       | 2.27 (1.03, 5.01)                           | 0.04     |
| PSS-4 score                            | 0.96 (0.84, 1.09)                           | 0.48     |
| Current financial insecurity           | 0.76 (0.50, 1.16)                           | 0.21     |
| Took questionnaire before June 1, 2020 | 0.51 (0.24, 1.07)                           | 0.07     |
